# Supplementary material for: Development and evaluation of a variably saturated flow model in the global E3SMLand Model (ELM) Version 1.0
Source: Copernicus journal article supplement (doi:10.5194/gmd-2018-44), 2018-03-02
Supplement: Supplementary file [file gmd-2018-44-AC1-supplement.pdf]

## **Development and evaluation of a variably saturated flow model in the global E3SM Land Model (ELM) Version 1.0 [MS no. gmd-2018-44]**

### **SC1: 'Code Availability', Lutz Gross**

To maintain reproducibility the authors need to tag the release in the GitHub repository that matches the model version described in the paper. This grants that check-ins after manuscript submission don't compromise reproducibility. As explained in [https://www.geoscientific-model-development.net/about/manuscript\\_types.html](https://www.geoscientific-model-development.net/about/manuscript_types.html) the preferred reference to this release is through the use of a DOI which is then cited in the paper. For projects in GitHub a DOI for a released code version can easily be created using for instance Zenodo, see <https://guides.github.com/activities/citable-code/> for details. The authors need also clarify how and under what conditions the reader can access the relevant version of the E3SM code. It is expected that any program code used for the results presented in the paper is available at the point of manuscript submission. Reference to a later release is not within the guidelines of GMD

### **Response:**

The research was performed using E3SM v1.0 and the code is available at

<https://github.com/E3SM-Project/E3SM>

E3SM Project, DOE. Energy Exascale Earth System Model. Computer Software. <https://github.com/E3SM-Project/E3SM.git>. 23 Apr. 2018. Web. doi:10.11578/E3SM/dc.20180418.36. We have added this information to Introduction section (line 131-142).
